# Supplementary material
Source: PubMed Central journal article supplement (PMC2948783)
Supplement: NIHMS207888-supplement-01.pdf [file NIHMS207888-supplement-01.pdf]

Supplementary Table 1 "Dynamics of fat absorption and impact of sham feeding on postprandial lipema  
Clinical testing schedule

E. Parks

| Time        | Notes/Sensory exposure                       | Time relative to capsule ingestion (minutes) | Time relative to tasting (minutes) | Blood draw # |
|-------------|----------------------------------------------|----------------------------------------------|------------------------------------|--------------|
| 0730        |                                              | -30                                          | -45                                | 1            |
| 0740        |                                              | -20                                          | -35                                | 2            |
| 0750        |                                              | -10                                          | -25                                | 3            |
| 0800        | "0" time = consume capsules (15' to consume) |                                              |                                    |              |
| 0815        | taste                                        | + 15                                         | 0                                  |              |
| <b>0818</b> |                                              | <b>+ 18</b>                                  | 3                                  | 4            |
| 0820        | taste                                        | + 20                                         | 5                                  |              |
| <b>0823</b> |                                              | <b>+ 23</b>                                  | 8                                  | 5            |
| 0825        | taste                                        | + 25                                         | 10                                 |              |
| <b>0828</b> |                                              | <b>+ 28</b>                                  | 13                                 | 6            |
| 0830        | taste                                        | + 30                                         | 15                                 |              |
| <b>0833</b> |                                              | <b>+ 33</b>                                  | 18                                 | 7            |
| 0835        | taste                                        | + 35                                         | 20                                 |              |
| <b>0838</b> |                                              | <b>+ 38</b>                                  | 23                                 | 8            |
| 0840        | taste                                        | + 40                                         | 25                                 |              |
| <b>0843</b> |                                              | <b>+ 43</b>                                  | 28                                 | 9            |
| 0845        | taste                                        | + 45                                         | 30                                 |              |
| 0850        | taste                                        | + 50                                         | 35                                 |              |
| <b>0853</b> |                                              | <b>+ 53</b>                                  | 38                                 | 10           |
| 0855        | taste                                        | + 55                                         | 40                                 |              |
| 0900        | taste                                        | + 60                                         | 45                                 |              |
| <b>0903</b> |                                              | <b>+ 63</b>                                  | 48                                 | 11           |
| <b>0910</b> |                                              | <b>+ 70</b>                                  | 55                                 | 12           |
| 0915        | taste                                        | + 75                                         | 60                                 |              |
| <b>0920</b> |                                              | <b>+ 80</b>                                  | 65                                 | 13           |
| 0930        | taste                                        | + 90                                         | 75                                 |              |
| <b>0935</b> |                                              | <b>+ 95</b>                                  | 80                                 | 14           |
| 0945        | taste                                        | + 105                                        | 90                                 |              |
| <b>0950</b> |                                              | <b>+ 110</b>                                 | 95                                 | 15           |
| 1000        | taste                                        | + 120                                        | 100                                |              |
| <b>1045</b> |                                              | <b>+ 165</b>                                 | 150                                | 16           |
| <b>1130</b> |                                              | <b>+ 210</b>                                 | 195                                | 17           |
| <b>1230</b> |                                              | <b>+ 270</b>                                 | 255                                | 18           |
| <b>1250</b> |                                              | <b>+ 290</b>                                 | 275                                | 19           |
| 1300        | "0" time = start of drink (15' to consume)   |                                              | 285                                | 20           |
| <b>1320</b> |                                              | <b>+ 20</b>                                  | 305                                | 21           |
| <b>1340</b> |                                              | <b>+ 40</b>                                  | 325                                | 22           |
| <b>1400</b> |                                              | <b>+ 60</b>                                  | 345                                | 23           |
| <b>1420</b> |                                              | <b>+ 80</b>                                  | 365                                | 24           |
| <b>1430</b> |                                              | <b>+ 90</b>                                  | 375                                | 25           |
| <b>1450</b> |                                              | <b>+ 110</b>                                 | 395                                | 26           |
| <b>1500</b> |                                              | <b>+ 120</b>                                 | 405                                | 27           |
| <b>1530</b> |                                              | <b>+ 150</b>                                 | 435                                | 28           |
| <b>1600</b> |                                              | <b>+ 180</b>                                 | 465                                | 29           |
| <b>1630</b> |                                              | <b>+ 210</b>                                 | 495                                | 30           |
| <b>1700</b> |                                              | <b>+ 240</b>                                 | 525                                | 31           |

Note different time points for blood draws were used for various measurements depending on the rate of change of the metabolite. For instance, time points for insulin measurement were optimized to detect immediate postprandial increases after lunch (see figure 2B), while the temporal pattern of TAG concentrations occurs later in the postprandial state.

**Supplementary Table 2.** Fatty acid composition of dietary fat sources

| Fatty acids (wt %) | Sources of dietary fat |             |              |
|--------------------|------------------------|-------------|--------------|
|                    | Evening meal shake     | Capsule Fat | Liquid Lunch |
| 14:0               | 0.1 ± 0.0              | 0.1 ± 0.0   | 7.7 ± 0.9    |
| 16:0               | 14.1 ± 1.2             | 7.0 ± 2.8   | 29.7 ± 1.4   |
| 16:1, n-7          | 1.2 ± 0.1              | 0.1 ± 0.0   | 1.4 ± 0.1    |
| 18:0               | 5.9 ± 1.1              | 4.5 ± 0.9   | 20.8 ± 2.2   |
| 18:1, n-9          | 66.1 ± 2.0             | 18.7 ± 1.6  | 34.8 ± 2.6   |
| 18:1, n-7          | 0.4 ± 0.9              | ND          | 0.9 ± 0.0    |
| 18:2, n-6          | 12.3 ± 0.6             | 67.5 ± 3.2  | 4.2 ± 0.5    |
| 20:1, n-9          | 0.3 ± 0.0              | 0.1 ± 0.1   | 0.2 ± 0.1    |
| 20:0               | 0.1 ± 0.2              | 0.4 ± 0.0   | 0.3 ± 0.2    |
| 22:0               | 0.1 ± 0.0              | 0.7 ± 0.0   | 0.1 ± 0.1    |

ND: not detectable by GC

The compositions of fatty acids in serum NEFA, lipoprotein-, meal-, and cream cheese were determined using an HP6890 gas chromatograph (Hewlett Packard, Norwalk, CT) as described previously.<sup>1</sup> The HF cream cheese contained 1.55g TAG, with the majority of the TAG-fatty acids as 14:0 (9%), 16:0 (32%), 18:1 (30%), and 18:2 (4%) and 17 mg free fatty acids per 5g aliquot (14:0 (7%), 16:0 (55%), 18:1 (24%), and 8:2 (4%)). The LF cream cheese contained 0.07g TAG and the TAG-fatty acid composition was 14:0 (9%), 16:0 (32%), 18:1 (30%), and 18:2 (5%), and undetectable amounts of free fatty acids per 5g aliquot.

To determine the enrichment of label in lipoprotein-TAG fatty acids and in meal-TAG, lipids were extracted<sup>2</sup> and the enrichment of oleic acid methyl esters determined by GC/MS, performed on an HP 6890 with a Mass Selective Detector HP 5973 using a DB-225 column (30m x 0.25 mm id and 0.25 um film thickness) with helium as the carrier gas. Electron impact was used to selectively monitor ions of oleic acid methyl esters with mass to charge ratios ( $m/z$ ) 296, 297, 298, 302 and 303. Enrichments were calculated in duplicate, using a 5-point standard curve. Comparable ion peak areas between standards and biological samples were achieved by either adjusting the volume injected, diluting, or concentrating the sample.

1. Donnelly KL, Smith CI, Schwarzenberg SJ, Jessorun J, Parks EJ. Sources of fatty acids stored in liver and secreted via lipoproteins in patients with nonalcoholic fatty liver disease. *J Clin Invest* 2005;115:1343-1351.
2. Folch J, Lees M, Sloane Stanley GH. A simple method for the isolation and purification of total lipids from animal tissues. *J Biol Chem* 1957;226:497-509.

**Supplementary Figure 1.** Percentage of chylomicron-TAG fatty acids that were linoleic acid (unlabeled) and oleic acid (labeled and unlabeled).

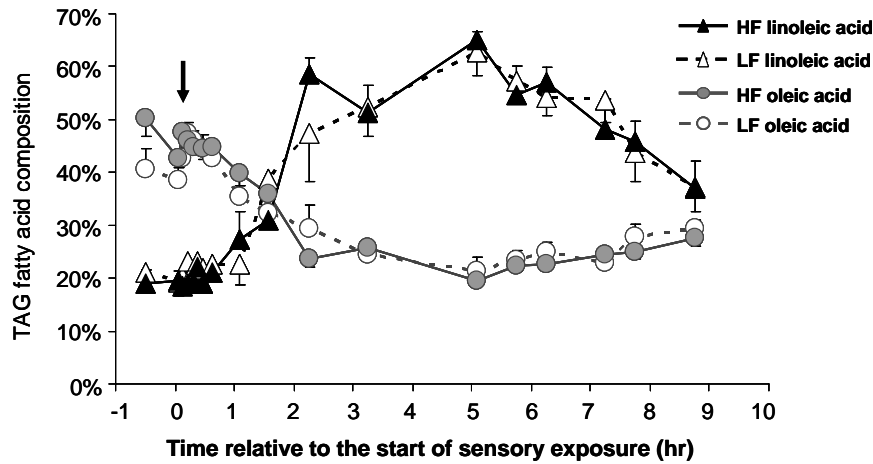

**Supplementary Figure 2.** Correlations between fasting NEFA concentration and residual evening-meal  $^{13}\text{C}_2$  enrichment in the morning before sensory exposure

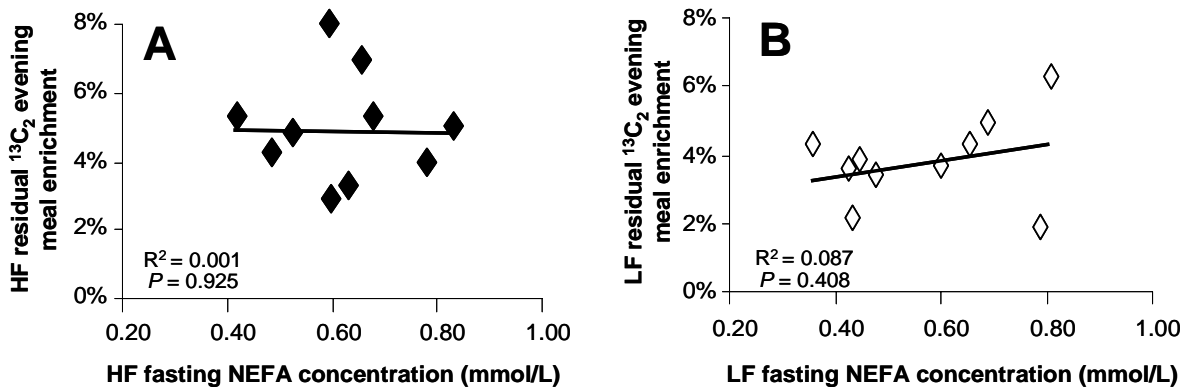

**Supplementary Figure 3.** Labeling pattern of capsule isotope and fatty acid in >400-TAG

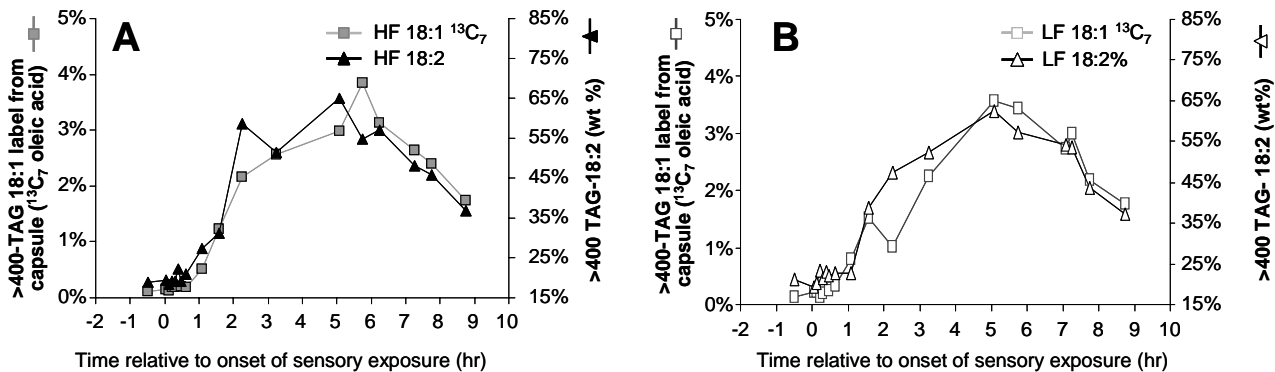

Supplementary figure 3 displays the labeling patterns of capsule isotope entry ( $^{13}\text{C}_7$  triolein) and unlabelled linoleic acid (18:2, n-6) fed as TAG in capsules during A) the HF test, and B) the LF test. Similar absorption kinetics are reflected by these two parameters early in the test (between 0 and 2 hr). After this time, between 2 and 4 hr, the two curves diverge which could reflect use of the enterocyte lipid droplet (e.g., the droplet would be rich in oleic acid from last night's meal and would dilute the  $^{13}\text{C}_7$  label if it is used for chylomicron-TAG synthesis).
